## Attenuation of Arterial Baroreceptor Reflex Response to Acute Hypovolemia During Induced Hypotension

Chikuni Taneyama, M.D.,\* Hiroshi Goto, M.D.,† Keiji Goto, M.D.,\* Kirk T. Benson, M.D.,‡  
Gregory K. Unruh, M.D.,§ Kasumi Arakawa, M.D., Ph.D.¶

Preservation of the arterial baroreflex response is important to restore cardiac output and blood pressure by reflex sympathetic nerve activation in the event of sudden hypotension caused by acute blood loss during surgery. However, the arterial baroreflex may be significantly attenuated by both anesthetics and hypotensive agents. In isoflurane-anesthetized dogs, the authors investigated the arterial baroreflex response 1) to bolus injections of sodium nitroprusside (SNP), prostaglandin E<sub>1</sub> (PGE<sub>1</sub>) and trimethaphan (TM); and 2) to rapid blood loss (5 ml/kg) before and during induced hypotension with SNP, PGE<sub>1</sub>, and TM by measuring mean arterial pressure (MAP), heart rate (HR), and renal sympathetic nerve activity (RSNA). Hypotension produced by both SNP and PGE<sub>1</sub> was accompanied by an increase in RSNA and HR. The increase in RSNA and HR following the SNP bolus injection was significantly greater than that following injection of PGE<sub>1</sub> ( $P < 0.05$ ). Trimethaphan was associated with a decrease in RSNA and HR. Rapid blood loss resulted in the same degree of MAP reduction ( $20 \pm 2$  mmHg) before and during induced hypotension. Sensitivities of baroreflex, as evaluated by ratios of maximum changes in RSNA or HR to MAP ( $\Delta$ RSNA/ $\Delta$ MAP,  $\Delta$ HR/ $\Delta$ MAP), in response to rapid blood loss, were significantly suppressed during continuously induced hypotension, as compared with responses before induced hypotension. Despite the same degree of induced hypotension ( $70 \pm 5$  mmHg of MAP),  $\Delta$ RSNA/ $\Delta$ MAP and  $\Delta$ HR/ $\Delta$ MAP in response to rapid blood loss were significantly greater with PGE<sub>1</sub> than those with SNP ( $P < 0.05$ ). Because of its sympathetic ganglion blocking action, arterial baroreflex sensitivity was suppressed by rapid blood loss during TM infusion. The authors conclude that induced hypotension with PGE<sub>1</sub> provides a greater margin of safety than that associated with SNP when acute blood loss occurs during isoflurane anesthesia. Trimethaphan is inferior to both PGE<sub>1</sub> and SNP in this respect. (Key words: Anesthetic techniques, deliberate hypotension: sodium nitroprusside; prostaglandin E<sub>1</sub>; trimethaphan. Blood pressure: baroreceptor reflexes, hypovolemia. Sympathetic nervous system: renal sympathetic nerve activity.)

INDUCING ARTERIAL HYPOTENSION with vasodilators is used to reduce surgical blood loss and to facilitate surgical procedures. During induced hypotension, compensatory general reflex sympathetic activation is elicited, which is

manifested as tachycardia and peripheral vasoconstriction, to maintain cardiac output and arterial blood pressure. It has been shown, however, that the arterial baroreflex is impaired by anesthetic agents as well as by vasodilators.<sup>1-9\*\*</sup> Under these circumstances, acute blood loss during surgery can cause a precipitous reduction of arterial blood pressure and cardiac output.

Sodium nitroprusside (SNP), a commonly used hypotensive agent, has been found not to attenuate arterial baroreflex responses.<sup>10,11</sup> However, the effects of other hypotensive agents, such as prostaglandin E<sub>1</sub> (PGE<sub>1</sub>) and trimethaphan (TM), have not been established. The purpose of this study was twofold: 1) To investigate arterial baroreflex response, during isoflurane anesthesia, to a bolus injection of SNP, PGE<sub>1</sub>, and TM by measuring heart rate and renal sympathetic nerve activity as indices of overall sympathetic activity; and 2) to investigate arterial baroreflex response to rapid blood loss during continuously induced hypotension with these agents during isoflurane anesthesia.

### Materials and Methods

This study was approved by the Kansas University Institutional Animal Care and Use Committee, and appropriate guidelines for the use of animal were observed during all aspects of this study.

### GENERAL PREPARATION

Adult mongrel dogs of either sex, weighing between 17.2 and 25.0 kg, were anesthetized using intravenous pentobarbital sodium (10 mg/kg) and thiopental sodium (10 mg/kg). After tracheal intubation with a cuffed endotracheal tube, the lungs were ventilated with a Harvard animal ventilator (Millis, MA) using oxygen in nitrogen (fractional inspired O<sub>2</sub> concentration [FI<sub>O<sub>2</sub>]: 0.4) at a tidal volume of 10–15 ml/kg and a frequency of 15–20 cycles/min to maintain PaCO<sub>2</sub> within 35 and 45 mmHg. Isoflurane was used to control mean arterial pressure at  $120 \pm 10$  mmHg in the absence of vasodilators throughout the experiment. The animals were paralyzed with pancuronium bromide (0.1 mg/kg intravenously [iv]) to avoid artifacts secondary to muscular movement. Polyethylene</sub>

\* Research fellow in Anesthesiology.

† Professor of Anesthesiology.

‡ Associate professor of Anesthesiology.

§ Assistant professor of Anesthesiology.

¶ Professor and Chairman of Anesthesiology.

Received from the Department of Anesthesiology, The University of Kansas Medical Center, Kansas City, Kansas. Accepted for publication March 28, 1990. Presented in part at the annual meeting of the American Society of Anesthesiologists, New Orleans, Louisiana, October 14–18, 1989.

Address reprint requests to Dr. Taneyama: Department of Anesthesiology, The University of Kansas Medical Center, 39th and Rainbow Boulevard, Kansas City, Kansas 66103.

\*\* Marty J, Lefevre P, Bardeau B, Farinotti R, Henzel C, Desmonts JM: Diazepam effects on baro-reflex control of heart rate and on plasma catecholamines (abstract). ANESTHESIOLOGY 59:A67, 1983

catheters were inserted into a femoral vein for iv administration of vasodilators, and in both femoral arteries, for measurement of arterial pressure and to perform rapid exsanguination. Arterial blood pressure was monitored via a pressure transducer (DTX Spectramed, Oxnard, CA) and recorded continuously. Mean arterial pressure (MAP) was derived by electronic integration of the pulsatile pressure signal. Heart rate (HR) was calculated from lead II of the electrocardiogram using a cardiometer (1321 San-ei, Japan).

#### RECORDING OF RENAL SYMPATHETIC NERVE ACTIVITY (RSNA)

The left kidney was exposed retroperitoneally by a left flank incision. Renal sympathetic nerves along the renal artery were isolated using a microscope. The distal end of the strands were crushed, and then immersed in mineral oil and placed on a bipolar silver electrode for recording the renal nerve discharges. Electrical impulses recorded from the renal sympathetic nerves were amplified using a preamplifier (AVB 10; bandwidth: 50–3,000 Hz; Nihon Kohden, Japan). The amplified nerve discharges were visualized on a dual-beam oscilloscope (VC 11 Nihon Kohden, Japan) and monitored by an audiospeaker. The neurogram was integrated by a resistance-capacitance integrator circuit (time constant, 2.0 s). Because integrated output is dependent on the voltages and frequencies of RSNA, it was used as a measurement of overall RSNA. Nerve activity was recorded after death in all dogs as a measurement of the level of zero "noise." Renal sympathetic nerve activity was continuously measured and recorded on a DAT tape PCM recorder (RD-100T TEAC, Montebello, CA), and played back on a multi-channel chart recorder (Omniscorder 8M14; San-ei, Japan).

#### EXPERIMENTAL PROTOCOL AND DATA ANALYSIS

Twenty animals were divided randomly into one of three groups to receive sodium nitroprusside (SNP:  $n = 6$ ), prostaglandin  $E_1$  ( $PGE_1$ :  $n = 7$ ) and trimethaphan (TM:  $n = 7$ ). After completion of the surgical preparation, a sufficient time (over 1 h) was allowed for hemodynamic stabilization before study.

**Study 1: Baroreflex Response to Bolus Injections of SNP,  $PGE_1$ , and TM.** Hypotension was induced by a bolus infusion of SNP (10  $\mu\text{g/kg}$ ),  $PGE_1$  (1.0  $\mu\text{g/kg}$ ), or TM (50  $\mu\text{g/kg}$ ). These doses of the three agents were found to decrease MAP to 60–70 mmHg at the same rate in the preliminary study. Renal sympathetic nerve activity and HR were measured with every 10-mmHg decrement of MAP from the preinjection level ( $120 \pm 10$  mmHg). Renal sympathetic nerve activity was expressed as percentage

change from the resting spontaneous nerve discharge before bolus injection of vasodilators. The relationships between changes of MAP and RSNA or HR after the bolus injection of vasodilators were analyzed, using a nonlinear regression program (SAS, PROC NLIN) with an IBM computer for a sigmoid logistic function described by Kent *et al.*<sup>12</sup> The logistic model was derived from the following formula:

$$\text{RSNA (or HR)} = A_1 / (1 + e^{A_2(\text{MAP} - A_3)}) + A_4$$

Using the above four parameters, the following descriptors of the baroreflex function curve were derived:  $A_1$  = range of RSNA (or HR);  $A_2$  = slope of reflex response;  $A_3$  = centering point of the function curve;  $A_4$  = minimum RSNA (or HR);  $A_1 + A_4$  = maximum RSNA (or HR). Maximum slope is estimated from the parameters as  $(A_1 \times A_2)/4$ .

Data were expressed as means  $\pm$  standard errors of the mean (SEM). Differences between individual means were compared, using a Student's *t* test for paired differences.

**Study 2: Baroreflex Response to Rapid Blood Loss Before and During Induced Hypotension.** After hemodynamic stabilization following bolus infusion of hypotensive agents (at least 30 min earlier), arterial blood (5 ml/kg) was rapidly withdrawn at the rate of 0.5 ml  $\cdot$  kg<sup>-1</sup>  $\cdot$  s<sup>-1</sup> over 10 s from femoral artery into heparinized glass syringes while measuring RSNA, HR, and MAP. Thereafter, the shed blood was retransfused and a steady state was re-established. Then, continuous infusions of either SNP (10–20  $\mu\text{g} \cdot \text{kg}^{-1} \cdot \text{min}^{-1}$ ),  $PGE_1$  (0.5–1.0  $\mu\text{g} \cdot \text{kg}^{-1} \cdot \text{min}^{-1}$ ), or TM (20–50  $\mu\text{g} \cdot \text{kg}^{-1} \cdot \text{min}^{-1}$ ) were begun and adjusted to obtain  $70 \pm 5$  mmHg of MAP, and the rapid blood loss study was repeated after 10 min of steady state of induced hypotension. Changes of RSNA were expressed as percent change from the resting spontaneous nerve discharges before the first rapid blood loss. Sensitivities of arterial baroreflex control of RSNA and HR in response to acute hypotension by rapid blood loss were compared, using the ratios of  $\Delta\text{RSNA}/\Delta\text{MAP}$  and  $\Delta\text{HR}/\Delta\text{MAP}$ , respectively, where  $\Delta\text{RSNA}$  was the maximum change in RSNA,  $\Delta\text{HR}$  was the maximum change in HR, and  $\Delta\text{MAP}$  was the maximum decrease in MAP.

All data were expressed as the means  $\pm$  SEM. Comparisons within experimental protocols were made using a repeated measurement analysis of variance (ANOVA). Multiple comparisons between individual means were performed using Newman-Keul's method. Differences with a statistical probability of less than 0.05 were considered significant.

#### Results

The inhaled concentration of isoflurane ranged from 1 to 2%, to control MAP at  $120 \pm 10$  mmHg. Arterial

TABLE 1. MAP, RSNA, and HR Before and After Bolus Injection of SNP, PGE<sub>1</sub>, and TM

|            | Vasodilators     | Baseline | After Infusion |
|------------|------------------|----------|----------------|
| MAP (mmHg) | SNP              | 126 ± 1  | 67 ± 2*        |
|            | PGE <sub>1</sub> | 124 ± 2  | 68 ± 2*        |
|            | TM               | 122 ± 2  | 65 ± 3*        |
| RSNA (%)   | SNP              | 100 ± 0  | 254 ± 10*      |
|            | PGE <sub>1</sub> | 100 ± 0  | 180 ± 6*       |
|            | TM               | 100 ± 0  | 13 ± 3*        |
| HR (bpm)   | SNP              | 144 ± 1  | 191 ± 5*       |
|            | PGE <sub>1</sub> | 142 ± 1  | 164 ± 3*       |
|            | TM               | 147 ± 2  | 133 ± 2*       |

Values are mean ± SEM. MAP = mean arterial pressure; RSNA = renal sympathetic nerve activity; HR = heart rate; SNP = sodium nitroprusside; PGE<sub>1</sub> = prostaglandin E<sub>1</sub>; TM = trimethaphan.  
\* *P* < 0.05, significantly different from baseline values. There are significant differences in RSNA and HR between three groups; SNP versus PGE<sub>1</sub> (*P* < 0.05), SNP versus TM (*P* < 0.01), PGE<sub>1</sub> versus TM (*P* < 0.01).

blood gas measurement revealed that PaCO<sub>2</sub> was 40.0 ± 3.5 mmHg, PaO<sub>2</sub>: 205.8 ± 9.5 mmHg, and pH: 7.39 ± 0.04 (mean ± SD) before each study.

Study 1: Baroreflex Responses to Bolus Injections of SNP, PGE<sub>1</sub>, and TM

The changes in MAP, RSNA, and HR after bolus injections of SNP, PGE<sub>1</sub>, and TM are summarized in table 1. There were no significant differences in time (s) to reach MAP at 60–70 mmHg among three agents (SNP: 33 ± 3 s, PGE<sub>1</sub>: 31 ± 3 s, TM: 33 ± 4 s; mean ± SEM). Sodium nitroprusside and PGE<sub>1</sub>-induced hypotension was accompanied by an increase in RSNA and HR. Despite the same decrease in arterial blood pressure, the increase in RSNA and HR caused by SNP was significantly higher than that produced by PGE<sub>1</sub>. Trimethaphan administration was associated with decreases in RSNA and HR. Figure 1 shows the relationship between per cent changes of RSNA and each 10-mmHg decrement of MAP produced by SNP and PGE<sub>1</sub>. Renal sympathetic nerve activity range (A<sub>1</sub>: *P* < 0.02), slope (A<sub>2</sub>: *P* < 0.02), and the maximum slope (A<sub>1</sub> × A<sub>2</sub>/4: *P* < 0.03) of the sigmoid logistic curve observed with SNP were significantly greater than those with PGE<sub>1</sub>. Renal sympathetic nerve activities reached plateaus at a higher MAP with SNP (point B) than with PGE<sub>1</sub> (point A). Similar results were obtained with HR with respect to MAP changes caused by SNP and PGE<sub>1</sub> (fig. 2). Because RSNA and HR decreased with reduction of MAP, data associated with administration of TM could not fit the sigmoid logistic function using a nonlinear regression curve.

Study 2: Baroreflex Responses Following Rapid Blood Loss Before and During Induced Hypotension

Figure 3 shows the time course of integrated RSNA, HR, and MAP during induced hypotension. After 3–5

min of induced hypotension, RSNA, HR, and MAP became stable, and they remained the same until rapid blood loss was performed (point B). Table 2 shows baseline values of MAP, RSNA, HR, and central venous pressure (CVP) during the normotensive state and during induced hypotension before rapid blood loss. There were no statistical differences in MAP, RSNA, HR, and CVP between the three groups before commencement of induced hypotension. Maximum changes in MAP and RSNA induced by rapid blood loss during the normotensive state, and during induced hypotension with SNP, PGE<sub>1</sub>, and TM, are shown in table 3. Despite the same MAP reduction (20 ± 2 mmHg) caused by rapid blood loss, maximum increases in RSNA and HR were significantly attenuated during induced hypotension, as compared with those values before induced hypotension. Figure 4 shows the original recording of RSNA and HR as a baroreflex response to rapid blood loss during induced hypotension with SNP,

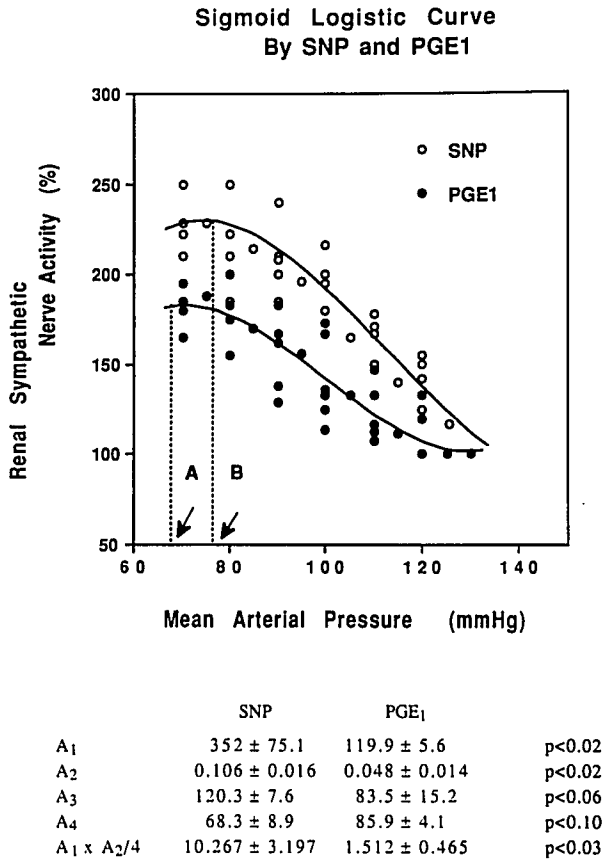

FIG. 1. Relationship between renal sympathetic nerve activity (RSNA) and mean arterial pressure (MAP) on sigmoid logistic curve. SNP = sodium nitroprusside; PGE<sub>1</sub> = prostaglandin E<sub>1</sub>; A = MAP at maximum RSNA on sigmoid logistic curve of SNP; B = MAP at maximum RSNA on sigmoid logistic curve of PGE<sub>1</sub>; A<sub>1</sub> = range of RSNA; A<sub>2</sub> = slope of reflex response; A<sub>3</sub> = centering point of the function curve; A<sub>4</sub> = minimum RSNA; (A<sub>1</sub> × A<sub>2</sub>)/4 = maximum slope. Student's *t* test was used for statistical comparison of means for paired difference.

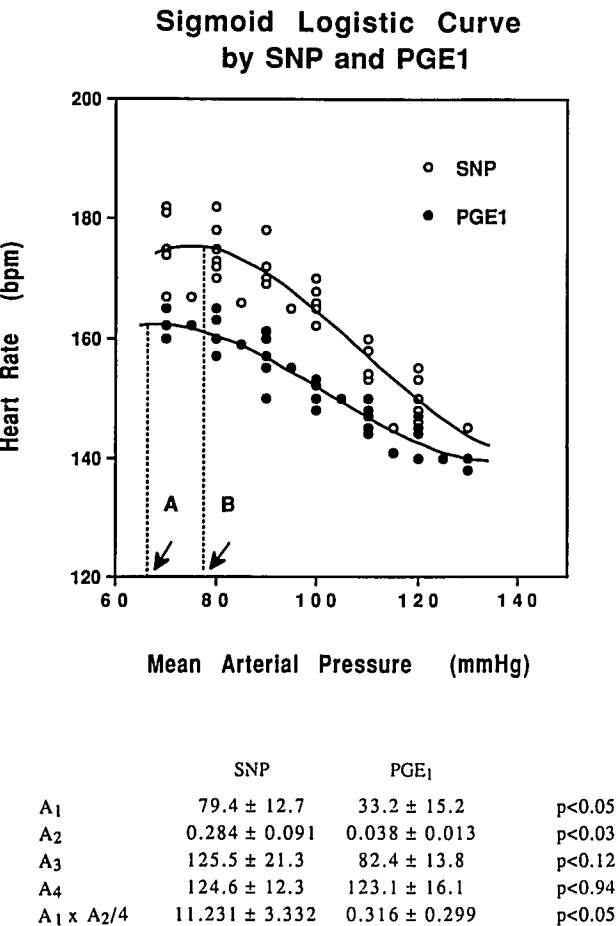

FIG. 2. Relationship between heart rate (HR) and mean arterial pressure (MAP) on logistic regression curve. SNP = sodium nitroprusside; PGE<sub>1</sub> = prostaglandin E<sub>1</sub>; A = MAP at maximum HR on sigmoid logistic curve of SNP; B = MAP at maximum HR on sigmoid logistic curve of PGE<sub>1</sub>; A<sub>1</sub> = range of HR; A<sub>2</sub> = slope of reflex response; A<sub>3</sub> = centering point of the function curve; A<sub>4</sub> = minimum HR; (A<sub>1</sub> × A<sub>2</sub>)/4 = maximum slope. Student's *t* test was used for statistical comparison of means for paired difference.

PGE<sub>1</sub>, and TM. The increases in RSNA and HR caused by rapid blood loss were greater with PGE<sub>1</sub> than with SNP (fig. 4A, B), whereas RSNA and HR were not increased by rapid blood loss during TM infusion (fig. 4C). Figure 5 shows the ratios of  $\Delta$ RSNA/ $\Delta$ MAP and  $\Delta$ HR/ $\Delta$ MAP as an index of sensitivity of arterial baroreflex response to rapid blood loss during induced hypotension.  $\Delta$ RSNA/ $\Delta$ MAP with PGE<sub>1</sub> ( $1.84 \pm 0.16$ ) was significantly higher ( $P < 0.05$ ) than with SNP ( $0.84 \pm 0.27$ ).  $\Delta$ HR/ $\Delta$ MAP with PGE<sub>1</sub> ( $0.39 \pm 0.06$ ) was also significantly higher ( $P < 0.05$ ) than with SNP ( $0.11 \pm 0.03$ ).

Discussion

In the present study, we attempted to create experimental conditions similar to those present clinically.

Anesthesia depth was judged by mean arterial pressure (MAP), which was maintained and controlled at  $120 \pm 10$  mmHg by adjusting the inspired isoflurane concentration. The primary role of arterial baroreflex is to adjust blood pressure toward baseline MAP, and baroreflex sensitivity can change, depending on the baseline blood pressure. Therefore, it is important to maintain the same MAP for the study of baroreflex sensitivity. Different inspired isoflurane concentrations (1–2%) might have influenced the outcome of the study by changing baseline sympathetic activity and response to hypotension. However, there were no statistical differences in baseline sympathetic activity (the integrated absolute RSNA, table 2) among three groups during the normotensive state. There were also no statistical differences in the degree of hypotension due to bolus injection of each vasodilator (table 1) and due to acute blood loss among the three groups (table 3). This

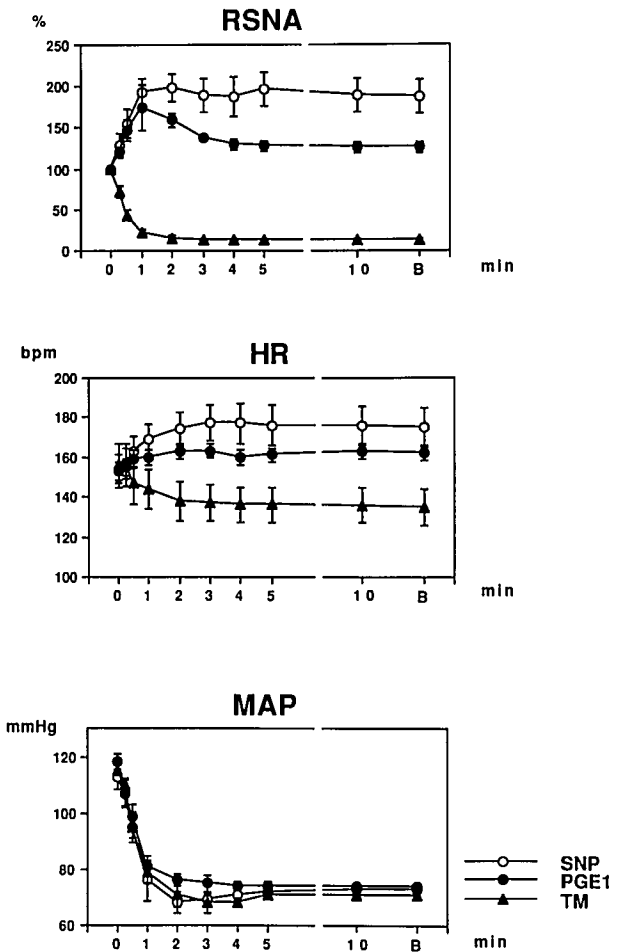

FIG. 3. The time course of renal sympathetic nerve activity (RSNA), heart rate (HR) and mean arterial pressure (MAP) during induced hypotension with sodium nitroprusside (SNP), prostaglandin E<sub>1</sub> (PGE<sub>1</sub>), and trimethaphan (TM). B = before rapid blood loss during induced hypotension.

TABLE 2. Baseline values of MAP, RSNA, and HR Before Rapid Blood Loss

| Variable    | Pre-SNP<br>Control | SNP-induced<br>Hypotension | Pre PGE <sub>1</sub><br>Control | PGE <sub>1</sub> -Induced<br>Hypotension | Pre-TM<br>Control | TM-Induced<br>Hypotension |
|-------------|--------------------|----------------------------|---------------------------------|------------------------------------------|-------------------|---------------------------|
| MAP (mmHg)  | 114 ± 4            | 73 ± 1*                    | 119 ± 3                         | 74 ± 1*                                  | 115 ± 2           | 71 ± 1*                   |
| IRSNA (μV)  | 3.1 ± 0.6          | 5.7 ± 0.9*                 | 3.2 ± 0.4                       | 4.1 ± 0.5*                               | 3.4 ± 0.4         | 0.8 ± 0.2*                |
| HR (bpm)    | 154 ± 7            | 175 ± 10*                  | 153 ± 4                         | 163 ± 3*                                 | 156 ± 9           | 136 ± 9*                  |
| CVP (mm Hg) | 4.2 ± 0.3          | 2.9 ± 0.1*                 | 4.4 ± 3.0                       | 3.0 ± 0.3*                               | 4.1 ± 0.6         | 2.8 ± 0.6*                |

Values are mean ± SEM.

IRSNA: integrated renal sympathetic nerve activity.

\* P < 0.05, significantly different from control values.

is probably because the baseline MAP was maintained at 120 ± 10 mmHg and isoflurane inspired concentration varied between 1 and 2%. In this study, we chose isoflurane as a basic anesthetic agent and to control MAP because it depresses baroreceptors in humans, but to a substantially lesser degree than halothane or enflurane.<sup>3,4</sup> Relatively small doses of barbiturates (pentobarbital 10 mg/kg, thiopental 10 mg/kg) were administered intravenously only at the time of induction of anesthesia. The effects of these barbiturates on the baroreflex, therefore, are thought to be minimal, as the actual baroreflex study was performed at least 2 h after induction of anesthesia. This is particularly true for thiopental, which is an ultra short-acting barbiturate. During continuously induced hypotension, MAP was maintained at 71–74 mmHg (fig. 4, table 2). These pressures are often used clinically for deliberate hypotension induced with vasodilators.

The results of this study show that bolus injections of SNP produced the highest increases in RSNA and HR as indicators of arterial baroreflex activity in dogs anesthetized with isoflurane. This is due to the lack of an effect of SNP on the arterial baroreflex, owing to its lack of direct action on the autonomic nervous system.<sup>10</sup> Therefore, SNP has been used as a standard agent to examine baroreflex sensitivity to reduction of arterial pressure.<sup>11</sup> Although several investigators have reported<sup>13–15</sup> that PGE<sub>1</sub> caused a similar baroreflex increase in HR following SNP in humans and dogs, Brunsting *et al.*<sup>16</sup> and Goto *et al.*<sup>17</sup> observed that HR was not significantly increased by the infusion of PGE<sub>1</sub>, even though arterial pressure decreased significantly. Feniuk<sup>18</sup> and Hedqvist and Wennmalm<sup>19</sup> also demonstrated that PGE<sub>1</sub> inhibited the tachycardia produced by electric or chemical sympathetic

nerve stimulation in animals. They suggested that this inhibitory effect of PGE<sub>1</sub> on sympathetic nerve activity is associated with a reduction of the neurotransmitter in preganglionic or postganglionic neurons. Furthermore, some prostaglandins (PGE<sub>2</sub> and PGI<sub>2</sub>) and arachidonic acid, a precursor of prostaglandins, attenuate the arterial baroreflex in response to hypotension.<sup>20–22</sup> Our observation that PGE<sub>1</sub>, one of the derivatives of arachidonic acid, attenuates the arterial baroreflex is in agreement with these findings. Our study was the first to compare differences between PGE<sub>1</sub> and SNP by constructing the MAP and RSNA or HR response curves. The slope of the sigmoid logistic curve following PGE<sub>1</sub> is less steep than that following SNP, indicating clearly that PGE<sub>1</sub> attenuates baroreflex control of RSNA and HR when the same level of hypotension is produced (figs. 1, 2).

Because of the ganglion-blocking effect, RSNA was depressed significantly by TM bolus injection, even though the arterial baroreceptors must have been unloaded because of arterial hypotension. This finding indicates that a reflex vasoconstrictive response to arterial hypotension after bolus injection of TM does not occur. Heart rate also decreased despite the acute arterial hypotension produced by TM bolus injection. This is in agreement with the observation by Wang *et al.*<sup>23</sup> that sympathetic ganglion blocking effect produces a gradual slowing of HR during a brief infusion of TM infusion. Conversely, several investigators<sup>24,25</sup> observed increases of HR after TM infusion. They suggest that HR may increase or decrease, depending on sympathetic or parasympathetic balance before and during TM infusion.

It has been recognized that the arterial baroreceptor possesses a characteristic set point, and it is reset so that

TABLE 3. Maximum Changes in MAP (ΔMAP), RSNA (ΔRSNA), and HR (ΔHR) Induced by Rapid Blood Loss Before and During Induced Hypotension by SNP, PGE<sub>1</sub>, and TM

| Variable    | Pre-SNP<br>Control | SNP-Induced<br>Hypotension | Pre-PGE <sub>1</sub><br>Control | PGE <sub>1</sub> -Induced<br>Hypotension | Pre-TM<br>Control | TM-Induced<br>Hypotension |
|-------------|--------------------|----------------------------|---------------------------------|------------------------------------------|-------------------|---------------------------|
| ΔMAP (mmHg) | -19 ± 2            | -19 ± 3                    | -21 ± 2                         | -21 ± 1                                  | -20 ± 2           | -21 ± 2                   |
| ΔRSNA (%)   | 63 ± 5             | 15 ± 6*                    | 64 ± 4                          | 37 ± 2*                                  | 57 ± 3            | -1 ± 1*                   |
| ΔHR (bpm)   | 15 ± 1             | 2 ± 1*                     | 17 ± 3                          | 9 ± 4*                                   | 18 ± 2            | 1 ± 1*                    |

Values are mean ± SEM. \*P < 0.05, significantly different from control values.

the equivalent baroreflex response will occur in response to the same degree of hypotension. During induced hypotension, baroreflex sensitivities to rapid blood loss were significantly suppressed as compared with those during the normotensive state (table 3). This indicates that baroreceptor resetting did not take place during induced hypotension. Formerly, several investigators speculated on how soon arterial baroreceptor resetting can take place, *i.e.*, in a matter of hours, days, or a week.<sup>26-28</sup> Recently, Dorward *et al.*<sup>29</sup> and Kunze<sup>30</sup> observed the rapid resetting of arterial baroreceptors in a matter of minutes, using animals either conscious or anesthetized with  $\alpha$ -chloralose, a drug that does not significantly attenuate the arterial baroreflex.<sup>31-33</sup> If rapid arterial baroreceptor resetting should occur in a matter of minutes, the reduction in MAP by rapid blood loss during induced hypotension should evoke the same increase in RSNA and HR as would occur during the normotensive state. Such a response was not evident in our study. Two factors may have contributed to failure of rapid arterial baroreceptor resetting. First, we examined baroreflex sensitivity within 20 min after induction of induced hypotension, which might have been before the completion of baroreceptor resetting. Second, isoflurane<sup>4</sup> and pentobarbital<sup>8</sup> can impair baroreflex control of RSNA and HR, as they depress the central nervous system in general. Thus, they might have attenuated acute baroreceptor resetting in this study.

Baroreflex response to rapid blood loss was significantly greater during PGE<sub>1</sub> than with SNP-induced hypotension (fig. 5), despite the same baseline-induced hypotension (MAP; 71–74 mmHg, table 2), and the same degree of further hypotension from rapid blood loss. This may be explained by using the sigmoid logistic curve of baroreflex

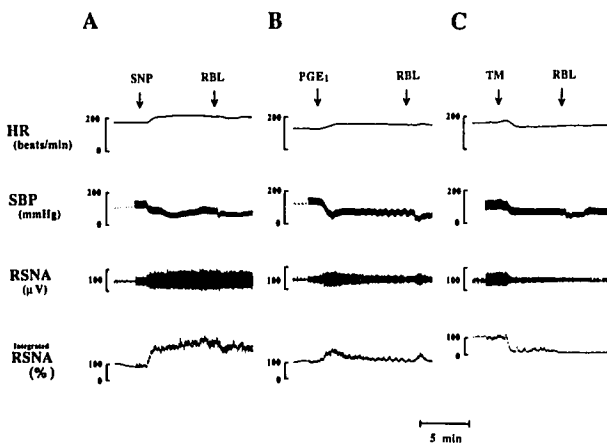

FIG. 4. Original recording showing baroreflex response to rapid blood loss estimated by renal sympathetic nerve activity (RSNA) and heart rate (HR) during induced hypotension with sodium nitroprusside (SNP), prostaglandin E<sub>1</sub> (PGE<sub>1</sub>), and trimethaphan (TM). SBP = systemic blood pressure; MAP = mean arterial pressure; RBL = rapid blood loss.

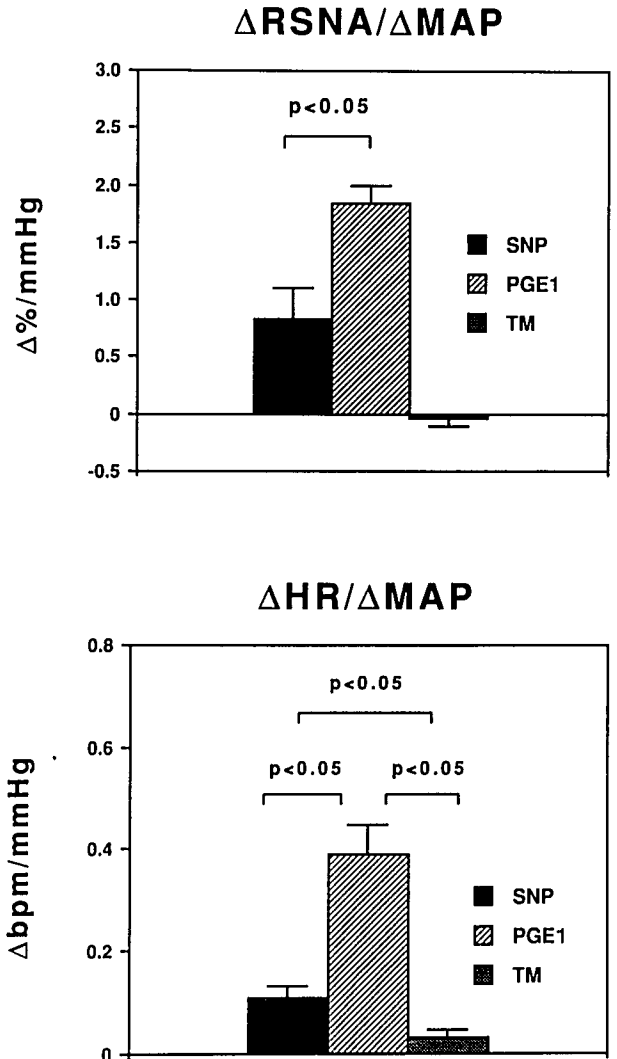

FIG. 5. The sensitivity of arterial baroreflex control of RSNA and HR using the ratios of  $\Delta\text{RSNA}/\Delta\text{MAP}$  and  $\Delta\text{HR}/\Delta\text{MAP}$ , which compared the changes in response to acute hypotension caused by rapid blood loss during induced hypotension with sodium nitroprusside (SNP), prostaglandin E<sub>1</sub> (PGE<sub>1</sub>), and trimethaphan (TM).  $\Delta\text{RSNA}$  = maximum change in RSNA;  $\Delta\text{HR}$  = maximum change in HR;  $\Delta\text{MAP}$  = maximum change in MAP.

at  $120 \pm 10$  mmHg in response to bolus injections of SNP and PGE<sub>1</sub> (figs. 1, 2). If arterial baroreceptor resetting did not occur during 10 min of induced hypotension, the sigmoidal nature of the reflex curve could produce an apparent decrease in sensitivity because of displacement of the reflex to a flat portion of the sigmoidal curve. Mean arterial pressure at maximum response of RSNA or HR on the sigmoid logistic curve of PGE<sub>1</sub> (figs. 1, 2: point A) is approximately 12 mmHg lower than that of SNP (figs. 1, 2: point B). This indicates that RSNA and HR reach their plateaus at a lower MAP with PGE<sub>1</sub>. Renal sympathetic nerve activity and HR during PGE<sub>1</sub>-induced hy-

potension, therefore, could still increase in response to further reduction of MAP because of rapid blood loss. Another possible explanation why PGE<sub>1</sub> preserved baroreflex better than SNP during induced hypotension is that the character of the reflex curve might have changed in such a way that the sigmoid logistic curve of PGE<sub>1</sub> becomes steeper than that of SNP at the baseline MAP of 71–74 mmHg.

Arterial baroreflex response to rapid blood loss was severely depressed during induced hypotension with TM, as compared with PGE<sub>1</sub> and SNP (figs. 4, 5). Because of blocking of sympathetic ganglia by TM, increases in RSNA and HR were not observed (figs. 4, 5), even though the baroreceptors must have been unloaded in response to rapid blood loss. The preservation of baroreflex response is believed to be important for cardiovascular stability during anesthesia and surgery. Therefore, TM may not be the ideal hypotensive agent when rapid blood loss is expected.

In conclusion, results from the present study demonstrate that PGE<sub>1</sub> is followed by smaller reflex increases in RSNA and HR than these following SNP. Arterial baroreflex response to acute hypovolemia was better maintained during induced hypotension with PGE<sub>1</sub> than with SNP during isoflurane anesthesia. Reflex sympathetic responses to acute hypovolemic hypotension did not occur during TM infusion. These findings indicate that PGE<sub>1</sub> may attenuate undesirable reflex sympathetic activity such as tachycardia during induced hypotension, and that induced hypotension with PGE<sub>1</sub> provides a greater margin of the safety than that following SNP when rapid bleeding occurs during surgery. Trimethaphan is inferior to both PGE<sub>1</sub> and SNP in this respect.

The authors thank Dr. Shozo Koyama, Professor of Physiology, Shinshu University School of Medicine, for helpful advice concerning the study, and Dr. Hugh S. Mathewson, Professor of Anesthesiology, University of Kansas Medical Center, for critical reading of the manuscript.

## References

1. Seagard JL, Hoppo FA, Donegan JH, Kalbfleisch JH, Kampine JP: Halothane and carotid sinus reflex. *ANESTHESIOLOGY* 57:191–202, 1980
2. Ebert TJ, Kotrly KJ, Vucins EJ, Pattison CZ, Kampine JP: Halothane anesthesia attenuates cardiopulmonary baroreflex control of peripheral resistance in humans. *ANESTHESIOLOGY* 63:668–674, 1985
3. Morton M, Duke PC, Ong B: Baroreflex control of heart rate in man awake and during enflurane and enflurane-nitrous oxide anesthesia. *ANESTHESIOLOGY* 52:221–223, 1980
4. Kotrly KJ, Ebert TJ, Vucins E, Iglar FO, Barney JA, Kampine JP: Baroreceptor reflex control of heart rate during isoflurane anesthesia in humans. *ANESTHESIOLOGY* 60:173–179, 1984
5. McGrath JC, MacKenzie JE, Millar RA: Effects of ketamine on central sympathetic discharge and the baroreceptor reflex during mechanical ventilation. *Br J Anaesth* 47:1141–1147, 1975
6. Kotrly KJ, Ebert TJ, Vucins E, Roerig DL, Kampine JP: Baroreceptor reflex control of heart rate during morphine sulfate, diazepam, N<sub>2</sub>O/O<sub>2</sub> anesthesia in humans. *ANESTHESIOLOGY* 61:558–563, 1984
7. Kotrly KJ, Ebert TJ, Vucins E, Roerig DL, Stadnicka A, Kampine JP: Effects of fentanyl-diazepam-nitrous oxide anaesthesia on arterial baroreflex control of heart rate in man. *Br J Anaesth* 58:406–414, 1986
8. Morita H, Nishida Y, Uemura N, Hosomi H: Effect of pentobarbital anesthesia on renal sympathetic nerve activity in the rabbit. *J Auton Nerv Syst* 20:57–64, 1987
9. Rigel DF, Millard RW: Effects of calcium channel antagonists on carotid sinus baroreflex control of arterial pressure and heart rate in anesthetized dog. *Circ Res* 64:276–286, 1989
10. Tinker JH, Michenfelder JD: Sodium nitroprusside: Pharmacology, toxicology and therapeutics. *ANESTHESIOLOGY* 45:340–354, 1976
11. Pickering TG, Gribbin B, Sleight P: Comparison of the reflex heart rate response to rising and falling arterial pressure in man. *Cardiovasc Res* 6:277–283, 1972
12. Kent BB, Drane JW, Blumenstein B, Manning JW: A mathematical model to assess changes in the baroreceptor reflex. *Cardiology* 57:295–310, 1972
13. Bergstrom S, Carlson LA, Ekelund LG, Oro L: Cardiovascular and metabolic response to infusions of prostaglandin E<sub>1</sub> and to simultaneous infusions of noradrenaline and prostaglandin E<sub>1</sub> in man. *Acta Physiol Scand* 64:322–339, 1965
14. Carlson LA, Oro L: Effect of prostaglandin E<sub>1</sub> on blood pressure and heart rate in the dog. *Acta Physiol Scand* 67:89–99, 1966
15. Nakano J, McCurdy R: Cardiovascular effects of prostaglandin E<sub>1</sub>. *J Pharmacol Exp Ther* 156:538–547, 1967
16. Brunsting LA, Salter DR, Murphy CE, Abd-Elfattah AS, Goldstein JP, Wechsler AS: The importance of load-independent analysis in assessment of the inotropic effect of prostaglandin E<sub>1</sub> in vivo. *J Thorac Cardiovasc Surg* 95:432–442, 1988
17. Goto F, Otani S, Kato S, Fujita T: Prostaglandin E<sub>1</sub> as a hypotensive drug during general anaesthesia. *Anaesthesia* 37:530–535, 1982
18. Feniuk W: The effects of prostaglandins E<sub>1</sub> and E<sub>2</sub> on heart rate responses to cervical sympathetic nerve stimulation and ganglion stimulant drugs in the anesthetized mouse. *Br J Pharmacol* 57:459–460, 1976
19. Hedqvist P, Wennmalm A: Comparison of the effects of prostaglandins PGE<sub>1</sub>, E<sub>2</sub> and F<sub>2α</sub> on the sympathetically stimulated rabbit heart. *Acta Physiol Scand* 83:156–162, 1971
20. Zucker IH, Panzenbeck J, Barker S, Tan W, Hajdu MA: PGI<sub>2</sub> attenuates baroreflex control of renal nerve activity by a vagal mechanism. *Am J Physiol* 254:R424–R430, 1988
21. Panzenbeck J, Tan W, Hajdu MA, Zucker IH: Intracoronary infusion of prostaglandin I<sub>2</sub> attenuates arterial baroreflex control of heart rate in conscious dogs. *Circ Res* 63:860–868, 1988
22. Panzenbeck J, Tan W, Hajdu MA, Cornish KG, Zucker IH: PGE<sub>2</sub> and arachidonate inhibit the baroreflex in conscious dogs via cardiac receptors. *Am J Physiol* 256:H999–1005, 1989
23. Wang HH, Liu LMP, Katz RL: A comparison of the cardiovascular effects of sodium nitroprusside and trimethaphan. *ANESTHESIOLOGY* 46:40–48, 1977
24. Jordan WS, Graves CL, Boyd WA, Ueda I, Roberts TS: Cardiovascular effects of three techniques for inducing hypotension during anesthesia. *Anesth Analg* 50:1059–1068, 1971
25. Scott DB, Stephen GW, Marshall RL, Jenkinson JL, MacRae WR: Circulatory effects of controlled arterial hypotension with trimethaphan during nitrous oxide/halothane anesthesia. *Br J Anaesth* 44:523–527, 1972

26. Kezde P: Mechanism of the carotid sinus in experimental hypertension. *Circ Res* 11:145-152, 1962
27. Broum AM, Saum WR, Tuley FH: A comparison of aortic baroreceptor discharge in normotensive and spontaneously hypertensive rat. *Circ Res* 39:488-496, 1976
28. Floral JS, Jones JV: Time course of changes in baroreflex sensitivity during the development of renovascular hypertension in rats. *J Physiol (Lond)* 296:27-28, 1979
29. Dorward PK, Andresen MC, Burke SL, Oliver JR, Korner PI: Rapid resetting of the aortic baroreceptors in the rabbit and its implications for short-term and long-term reflex control. *Circ Res* 50:428-439, 1982
30. Kunze DI: Rapid resetting of the carotid baroreceptor reflex in the cat. *Am J Physiol* 241:H802-H806, 1981
31. Greisheimer EM: The circulatory effects of anesthetics, *Handbook of Physiology Circulation Section 2 Vol. 3*. Edited by Hamilton WF. Washington, American Physiology Society, 1965, pp 2477-2510
32. Van Citter RL, Franklin DL, Rushmer RF. Left ventricular dynamics in dogs during anesthesia with alpha-chloralose and sodium pentobarbital: *Am J Physiol* 13:349-354, 1964
33. Matsumiya K, Ninomiya I: Anesthetic effects on tonic and reflex renal sympathetic nerve activity in awake cats. *Am J Physiol* 256:R371-378, 1989
